# 1 **Bacterial Community Shift in Marine Tar Balls following Low Salinity Exposure**

2 Mai Hoang Tran and Joong-Wook Park

3 Department of Biological and Environmental Sciences, Troy University, Troy, AL 36082, USA

4 Corresponding author: Joong-Wook Park, [jwpark@troy.edu](mailto:jwpark@troy.edu), Tel. 334-808-6416, Fax. 334-670-3662

5 Running title: Low salinity affects bacterial community in tar balls

6

7 **Abstract:** The persistence and recurrence of tar balls causes detrimental effects on coastal wildlife, tourism, and  
8 fisheries. Previously, the human pathogen *Vibrio vulnificus* was detected in marine tar balls in the Gulf of Mexico.  
9 Marine tar balls also migrate to low-salt water bodies near the shore. The bacterial communities in tar balls from these  
10 environments, however, have not been fully characterized. Herein we describe our studies on the effect of reduced  
11 salinity on bacterial communities in marine tar balls. Tar balls collected from the Gulf of Mexico were incubated in  
12 deionized water for six months, and their microbial fingerprints were visualized using denaturing gradient gel  
13 electrophoresis. Our data show that the indigenous bacterial communities in marine tar balls shifted after being  
14 exposed to low-salinity condition. Dominant genera in the tar balls at low salinity were *Aquisalimonas* and  
15 *Parvibaculum*, neither of which includes known human pathogens.

16 **Keywords:** tar balls; salinity; estuarine; bacterial community; oil spill

## 17 **1. Introduction**

18 After being released into the ocean, petroleum hydrocarbons undergo multiple weathering processes, including  
19 evaporation, emulsification, dissolution, and oxidation [1]. Tar balls are a form of weathered oil occurring in discrete  
20 pieces of about 10 cm or less in diameter that can be washed onto beaches, float in water, or lie on the seafloor [1, 2].  
21 Tar balls consist of a hard outer crust and a sticky semisolid core [3, 4]. The weathered oil in tar balls contains high  
22 concentrations of recalcitrant oil remnants such as long-chain alkanes ( $n > 16$ ), polycyclic aromatic hydrocarbons, and  
23 oxygenated hydrocarbons [5, 6]. In addition to the weathered tar balls, oil mats formed after oil spills under the ocean  
24 can be broken into small pieces by storms or hurricanes, producing less-weathered forms of tar balls [7]. Much effort  
25 has been made to clean the Gulf of Mexico after the Deepwater Horizon (DH) oil spill in 2010, but tar balls still  
26 reappeared after subsequent storms or hurricanes, causing recurrent problems along the Gulf coast.

27 The persistence of tar balls in ecosystems is a threat to coastal wildlife, tourism, and fisheries [8]. Recent research  
28 found that the DH-oil-spill-related tar balls contained stable free radicals and genotoxic metals such as chromium and  
29 nickel [9, 10], posing risks to human health. Additionally, a study by Tao *et al.* in 2011 showed that there was a 100-  
30 fold higher accumulation of *Vibrio vulnificus*, a human pathogen, in tar balls collected on the Gulf coast, compared to  
31 samples collected from sea water or sand [11]. This result suggests that the unique chemical and physical features of  
32 tar balls can create a niche for certain bacterial species, including human pathogens.

33 In October 2010, tar balls from the DH oil spill drifted to Lake Pontchartrain, an estuary on the Gulf coast [12, 13].  
34 Changes in the ambient salinity as the tar balls traveled to the estuarine lake could affect the structures of their bacterial  
35 communities [14, 15]. Previous studies demonstrated that there were variations in microbial communities in water  
36 samples along a salinity gradient [16-18]. To the best of our knowledge, no research has been conducted on tar ball  
37 bacterial communities as they are exposed to low salinity environments. Given the fact that tar balls can nurture human  
38 pathogens [11], it is crucial to study the tar ball bacteria in estuarine environments. Here we investigated the bacterial  
39 community shift and dominant bacterial species in tar balls on exposure to low salinity condition.

## 40 2. Materials and Methods

41 **Sampling, microcosm preparation and DNA extraction.** Tar ball samples were collected in September, 2012,  
42 immediately after Hurricane Isaac at Alabama beach (N30°14'30.23", W87°43'41.90") and stored at 4 °C for  
43 microcosm study and at -20 °C for initial bacterial community analysis. A microcosm was set up in October 2012 by  
44 placing tar balls with an equal volume of sterilized deionized water in a sterilized bottle. The tar balls were sampled  
45 after six months of incubation at 35 °C without shaking. The salinity of the microcosm was 495 ppm and the pH of  
46 the microcosm was 6.5. Total DNA was extracted from 0.5 g of tar ball samples using PowerSoil™ DNA Isolation  
47 Kit according to the manufacturer's instructions (MoBio Laboratories, Carlsbad, CA). Extracted DNA was kept at -20  
48 °C prior to analysis.

49 **Polymerase chain reaction (PCR).** The primer set 341F with GC clamp and 534R was used to selectively  
50 amplify the V3 region of 16S rRNA gene from the total DNA [19]. One µL from each total DNA sample was mixed  
51 with 10 pmol of each primer, 0.25 mM of dNTP, 5 µL of 10x Green *Taq* PCR buffer, and 1 µL of Green *Taq* DNA  
52 polymerase to make a 50 µL PCR mixture (GenScript, Piscataway, NJ). PCR was set for initial denaturation at 95 °C  
53 for 5 minutes, followed by thirty five cycles, each comprising 20 seconds at 95 °C, 45 seconds at 55 °C, and 45 seconds

54 at 72 °C. The reactions were finished with a final extension at 72 °C for 7 minutes. The amplification products were  
55 checked for integrity using 1.5% agarose gel electrophoresis.

56 **Denaturing gradient gel electrophoresis (DGGE).** Eight percent polyacrylamide gels were cast with a linear  
57 denaturing gradient of 40% on the top and 60% on the bottom. An equal volume of the PCR products from each  
58 sample was subjected to DGGE electrophoresis on a Bio-Rad DCode™ system at 45 V for 16 hours in 1x Tris-acetate  
59 EDTA buffer (TAE, pH 8.0) (Bio-Rad Laboratories, Hercules, CA). Immediately after electrophoresis, the gels were  
60 stained with ethidium bromide and placed on a UV transilluminator for photographing (Fisher Scientific, Pittsburgh,  
61 PA).

62 **DGGE band excision and DNA sequencing.** Selected DGGE bands were excised and submerged in 50 µL of  
63 deionized water for 24 hours. One µL of the supernatant containing the eluted DNA was used as template DNA for  
64 subsequent PCR-DGGE procedure (using the same experiment conditions as described above) to screen the purity of  
65 the excised DGGE band. When necessary, this process was repeated until one single DGGE band of interest was  
66 detected on the gels. The final PCR products were purified using MEGAquick-spin™ Total Kit (iNtRON  
67 Biotechnology Inc., Korea) according to the manufacturer's instructions. The clean partial 16S rRNA gene amplicons  
68 were sequenced with forward and reverse primers separately by Genewiz Inc. (Genewiz Inc., South Plainfield, NJ).  
69 Each set of forward and reverse sequences was assembled into a consensus sequence using the DNA Subway program  
70 (Cold Spring Harbor Laboratory, Cold Spring Harbor, NY). The consensus sequences were aligned with 16S rRNA  
71 gene sequences in GenBank DNA libraries using Basic Local Alignment Search Tool (BLAST) [20].

72 **Gel Image Processing.** Bionumerics version 7.6 platform was used to identify the bands and measure their  
73 intensity with respect to the background noise (Applied Maths, Austin, Texas).

### 74 **3. Results and Discussion**

75 Our data show that indigenous bacterial communities in marine tar balls shifted when exposed to a low salinity  
76 condition. Indigenous bacterial populations were decreased (bands A, B, and C), not changed (band D), or increased  
77 (band E) after 6 months of incubation in sterilized deionized (DI) water (Fig. 1). Since no microorganisms were  
78 introduced in the microcosm, all bacteria thriving in the tar ball samples were indigenous bacteria. Considering that  
79 the salinity of the Gulf of Mexico is 0 to 500 ppm in tidal fresh zones, 500 to 2,500 ppm in mixing zones, and above  
80 2,500 ppm in seawater zones [21], our microcosms' salinity of 495 ppm is categorized, for the purpose of this study,

81 in the tidal fresh zone. A steep reduction in salinity from the seawater to the tidal fresh zone is considered to have  
82 triggered the bacterial community shift in the marine tar balls. Our observation was consistent with previous literature  
83 that showed different microbial diversity along salinity gradients in estuaries [17, 18] and a study reporting unique  
84 hydrocarbon-enriched bacterial communities established in response to changed salinity levels [16]. However, the  
85 studies mentioned above used water samples, while our research tested marine tar balls collected from the Gulf of  
86 Mexico.

87 DGGE bands A, B, and C represent bacterial species dominant in marine tar balls, with their populations  
88 diminishing under low salinity conditions (Fig. 1). The DNA sequence of band A had an 85 % match in identity with  
89 the 16S rRNA gene of *Methylocystaceae bacterium* strain PKR-39 (Table 1), a type II methanotroph originally  
90 isolated from rhizosphere soil. Methanotrophic phylotypes were previously identified at the Gulf coast after the DH  
91 oil spill [22-24]. The presence of methanotrophs suggests hydrocarbons in the tar balls had been degraded into methane  
92 by methanogenic microorganisms [25, 26] when the tar balls were on the Gulf coast. DNA sequencing data of bands  
93 B and C showed that they belonged to members of the families *Sphingomonadaceae* (band B) and *Rhodobacteraceae*  
94 (band C), both of which are well-known marine taxa with an ability to degrade oil [27-29]. Multiple studies have  
95 found these taxa dominating in coastal water and sediments along the Gulf of Mexico after the DH oil spill [28, 30-  
96 32]. Moreover, *Rhodobacteracea* are known to be primary surface-colonizing bacteria in temperate coastal ecosystems,  
97 allowing other bacteria to colonize and grow on surfaces [33].

98 Band D appeared in all tar ball samples with relatively consistent intensity (Fig. 1). The characterized genus closest  
99 to the 16S rRNA gene sequence in band D was *Aquisalimonas* (Table 1). Thus far, only three species of *Aquisalimonas*  
100 have been described - *A. asiatica*, *A. halophila*, and *A. lutea* - all of which are moderately halophilic and unable to  
101 survive in salinity concentrations lower than 1 % [34-36]. The dominance of band D under the low salinity condition  
102 suggests a novel *Aquisalimonas* species that thrive in salinity concentrations lower than 1 %, however, further study  
103 is necessary to confirm this observation. There has been no report on the pathogenicity of the three *Aquisalimonas*  
104 spp.

105 Band E was detected only in the tar ball samples incubated in sterilized DI-water for six months. As mentioned  
106 above, the bacterial species representing band E was indigenous to the marine tar balls, since no microorganisms were  
107 introduced in the microcosms. Therefore, it is likely that the abundance of species E in marine tar balls was below the

108 detection limit of DGGE and increased under low salinity conditions [37]. DNA sequencing of this band showed that  
109 the species was closely related to *Parvibaculum* sp. MBNA2 (Table 1). This bacterial strain was previously isolated  
110 from freshwater sediments and a brackish water mud [38, 39]. Oiled wetland sediment and sea water samples collected  
111 in December 2010 along the Gulf of Mexico were reported to contain a large bacterial population affiliated with the  
112 genus *Parvibaculum*, [31]. Previous research has reported *Parvibaculum* spp. capable of degrading various  
113 hydrocarbon compounds, including PAH, alkanes, and surfactants [40-42]. No known human pathogens were reported  
114 belonging to the genus *Parvibaculum*.

115 In this research, we demonstrated that the indigenous bacterial community of marine tar balls was shifted when  
116 exposed to low salinity conditions and that dominant bacterial species in the tar balls at low salinity conditions were  
117 not phylogenetically close to potential human pathogens. The steep decline in salinity is most likely the major factor  
118 affecting the bacterial communities. However, this research did not consider other possible effectors during tar balls'  
119 migration from the ocean to estuarine or inland water bodies, such as an introduction of exogenous bacteria and other  
120 environmental factors (e.g., temperature, pH, dissolved oxygen, and dissolved nutrients). We expect that our study  
121 provides preliminary data to support further research on pathogens in estuarine tar balls.

122

123 **Acknowledgements:** We thank Dr. Ahjeong Son at Auburn University (currently at Ewha Womans University) for  
124 providing tar ball samples. This work was supported by the Chancellor's Fellowships and the Faculty Development  
125 Research grants, Troy University, Troy AL, and by the Beta Beta Beta Research Scholarship Foundation, Beta Beta  
126 Beta National Biological Honor Society.

127 **Conflict of Interest:** The authors declare no conflict of interest.

128

## 129 **References**

130 1. Oil in the sea III: inputs, fates, and effects. National Academies Press, Washington, D.C., USA, 2003. Available  
131 online: <http://www.nap.edu/catalog/10388/oil-in-the-sea-iii-inputs-fates-and-effects> (accessed on 12 September  
132 2017)

- 133 2. Wang, P.; Roberts, T.M. Distribution of surficial and buried oil contaminants across sandy beaches along NW  
134 Florida and Alabama coasts following the Deepwater Horizon oil spill in 2010. *J. Coast Res.* **2013**, 29, 144–155.
- 135 3. Goodman, R. Tar balls: the end state. *Spill Sci. Technol. Bull.* **2003**, 8, 117–121.
- 136 4. Lorenson, T.D.; Hosteller, F.D.; Rosenbauer, R.J.; Peters, K.E.; Dougherty, J.A.; Kvenvolden, K. A.; Gutmacher,  
137 C.E.; Wong, F.L.; Normark, W.R. Natural offshore oil seepage and related tarball accumulation on the California  
138 Coastline—Santa Barbara Channel and the Southern Santa Maria Basin; source identification and inventory.  
139 Geological Survey Report No. 2009-1225. Department of the Interior, USA, 2009; pp. 119.
- 140 5. Aeppli, C.; Carmichael, C. A.; Nelson, R. K.; Lemkau, K.L.; Graham, W. M.; Redmond, M.C.; Valentine, D.L.;  
141 Reddy C.M. Oil weathering after the Deepwater Horizon disaster led to the formation of oxygenated residues.  
142 *Environ. Sci. Technol.* **2012**, 46, 8799–8807.
- 143 6. Liu, Z.; Liu, J.; Zhu, Q.; Wu, W. The weathering of oil after the Deepwater Horizon oil spill: insights from the  
144 chemical composition of the oil from the sea surface, salt marshes and sediments. *Environ. Res. Lett.* **2012**, 7,  
145 035302.
- 146 7. Operational Science Advisory Team (OSAT). Summary report for fate and effects of remnant oil in the beach  
147 environment. Update Feb 2011, cited Aug 13, 2015. Available online:  
148 <http://www.restorethegulf.gov/sites/default/files/u316/OSAT-2%20Report%20no%20tr.pdf> (accessed on 12  
149 September 2017)
- 150 8. Warnock, A.M.; Hagen, S. C.; Passeri, D.L. Marine tar residues: a review. *Water, Air, Soil Pollut.* **2015**, 226, 68.
- 151 9. Kiruri, L.W.; Dellinger, B.; Lomnicki, S. Tar balls from Deep Water Horizon oil spill: environmentally persistent  
152 free radicals (EPFR) formation during crude weathering. *Environ. Sci. Technol.* **2013**, 47, 4220–4226.
- 153 10. Wise, Jr. J.P.; Wise, J.T.F.; Wise, C.F.; Wise, S.S.; Gianios, C.; Xie, H.; Thompson, W.D.; Perkins, C.; Falank,  
154 C.; Wise, Sr. J.P. Concentrations of the genotoxic metals, chromium and nickel, in whales, tar balls, oil slicks,  
155 and released oil from the Gulf of Mexico in the immediate aftermath of the deepwater horizon oil crisis: is  
156 genotoxic metal exposure part of the deepwater horizon legacy? *Environ. Sci. Technol.* **2014**, 48, 2997–3006.
- 157 11. Tao, Z.; Bullard, S.; Arias, C. High numbers of *Vibrio vulnificus* in tar balls collected from oiled areas of the  
158 north-central Gulf of Mexico following the 2010 BP Deepwater Horizon oil spill. *Ecohealth* **2011**, 8, 507–511.
- 159 12. Gulf Coast oil disaster: tar balls hit Lake Pontchartrain shores. CNN, Update Jul 2010. Available online:  
160 <http://www.cnn.com/2010/US/07/05/gulf.oil.pontchartrain/> (accessed on 12 September 2017)

- 161 13. Nearly 1,700 pounds of oil captured in Lake Pontchartrain. Times-Picayune, Update Jul 2010. Available online:  
162 [http://www.nola.com/news/gulf-oil-spill/index.ssf/2010/07/nearly\\_17000\\_pounds\\_of\\_oil\\_cap.html](http://www.nola.com/news/gulf-oil-spill/index.ssf/2010/07/nearly_17000_pounds_of_oil_cap.html) (accessed on  
163 12 September 2017)
- 164 14. Oren, A. The bioenergetic basis for the decrease in metabolic diversity at increasing salt concentrations:  
165 Implications for the functioning of salt lake ecosystems. *Hydrobiologia* **2001**, 466, 61–72.
- 166 15. Zhang, L.; Gao, G.; Tang, X.; Shao, K. Impacts of different salinities on bacterial biofilm communities in fresh  
167 water. *Can. J. Microbiol.* **2014**, 60, 319–326.
- 168 16. Jurelevicius, D.; Alvarez, V.M.; Marques, J.M.; de Sousa Lima, L.R.; Dias Fde, A.; Seldin, L. Bacterial  
169 community response to petroleum hydrocarbon amendments in freshwater, marine, and hypersaline water-  
170 containing microcosms. *Appl. Environ. Microbiol.* **2013**, 79, 5927–5935.
- 171 17. Rodrigues, C.S.; Souza, S.S.; Rezende, R.P.; Silva, A.; Andrioli, J.L.; Costa, H.; Fontana R.; Dias J.C. Application  
172 of denaturing gradient gel electrophoresis for detection of bacterial and yeast communities along a salinity  
173 gradient in the estuary of the Cachoeira River in Brazil. *Genet. Mol. Res.* **2013**, 12, 1752–1760.
- 174 18. They, N.H.; Ferreira, L.M.; Marins, L.F.; Abreu, P.C. Bacterial community composition and physiological shifts  
175 associated with the El Niño Southern Oscillation (ENSO) in the Patos Lagoon Estuary. *Microb. Ecol.* **2014**, 69,  
176 525–534.
- 177 19. Muyzer, G.; de Waal, E.C.; Uitterlinden, A.G. Profiling of complex microbial populations by denaturing gradient  
178 gel electrophoresis analysis of polymerase chain reaction-amplified genes coding for 16S rRNA. *Appl. Environ.*  
179 *Microbiol.* **1993**, 59, 695–700.
- 180 20. Altschul, S.F.; Gish, W.; Miller, W.; Lipman, D.J. Basic local alignment search tool. *J. Mol. Biol.* **1990**, 215,  
181 403–410.
- 182 21. Estuarine salinity zones in Gulf of Mexico atlas. National Coastal Data Development Center (NCDDC) - National  
183 Oceanic and Atmospheric Administration (NOAA). Available online:  
184 <http://www.ncddc.noaa.gov/website/DataAtlas/atlas.htm?plate=Salinity%20-%20Zones> (accessed on 12  
185 September 2017)
- 186 22. Kessler, J.D.; Valentine, D.L.; Redmond, M.C.; Du, M.; Chan, E.W.; Mendes, S.D.; Quiroz E.W.; Villanueva  
187 C.J.; Shusta S.S.; Werra L.M.; Yvon-Lewis S.A.; Weber T.C. A persistent oxygen anomaly reveals the fate of  
188 spilled methane in the deep Gulf of Mexico. *Science* **2011**, 331, 312–315.



- 189 23. Mason, O.U.; Hazen, T.C.; Borglin, S.; Chain, P.S.; Dubinsky, E.A.; Fortney, J.L.; Han J.; Holman H.Y.; Hultman  
190 J.; Lamendella R.; Mackelprang R.; Malfatti S.; Tom L.M.; Tringe S.G.; Woyke T.; Zhou J.; Rubin E.M.; Jansson  
191 J.K. Metagenome, metatranscriptome and single-cell sequencing reveal microbial response to Deepwater Horizon  
192 oil spill. *ISME J.* **2012**, 6, 1715–1727.
- 193 24. Kimes, N.E.; Callaghan, A.V.; Suflita, J.M.; Morris, P.J. Microbial transformation of the Deepwater Horizon oil  
194 spill: past, present, and future perspectives. *Front. Microbiol.* **2014**, 5, 1–11.
- 195 25. Gray, N.D.; Sherry, A.; Hubert, C.; Dolfing, J.; Head, I.M. Methanogenic degradation of petroleum hydrocarbons  
196 in subsurface environments remediation, heavy oil formation, and energy recovery. *Adv. Appl. Microbiol.* **2010**,  
197 72, 137–161.
- 198 26. Berdugo-Clavijo, C.; Gieg, L.M. Conversion of crude oil to methane by a microbial consortium enriched from  
199 oil reservoir production waters. *Front. Microbiol.* **2014**, 5, 197.
- 200 27. Mohn, W.W.; Mertens, B.; Neufeld, J.D.; Verstraete, W.; De Lorenzo, V. Distribution and phylogeny of  
201 hexachlorocyclohexane-degrading bacteria in soils from Spain. *Environ. Microbiol.* **2006**, 8, 60–68.
- 202 28. Kostka, J.E.; Prakash, O.; Overholt, W.A.; Green, S.J.; Freyer, G.; Canion, A.; Delgado J.; Norton N.; Hazen  
203 T.C.; Huettel M. Hydrocarbon-degrading bacteria and the bacterial community response in Gulf of Mexico beach  
204 sands impacted by the deepwater horizon oil spill. *Appl. Environ. Microbiol.* **2011**, 47, 7962–7974.
- 205 29. Wang, W.; Zhong, R.; Shan, D.; Shao, Z. Indigenous oil-degrading bacteria in crude oil-contaminated seawater  
206 of the Yellow Sea, China. *Appl. Microbiol. Biotechnol.* **2014**, 98, 7253–7269.
- 207 30. Redmond, M.; Valentine, D. Natural gas and temperature structured a microbial community response to the  
208 Deepwater Horizon oil spill. *PNAS* **2012**, 109, 20292–20297.
- 209 31. Looper, J.K.; Cotto, A.; Kim, B.Y.; Lee, M.K.; Liles, M.R.; Ní Chadhain, S.M.; Son A. Microbial community  
210 analysis of Deepwater Horizon oil-spill impacted sites along the Gulf coast using functional and phylogenetic  
211 markers. *Environ. Sci. Process Impacts* **2013**, 15, 2068–2079.
- 212 32. Newton, R.J.; Huse, S.M.; Morrison, H.G.; Peake, C.S.; Sogin, M.L.; McLellan, S.L. Shifts in the microbial  
213 community composition of Gulf coast beaches following beach oiling. *PLoS One* **2013**, 8, 1–13.
- 214 33. Dang H.; Li T.; Chen M.; Huang, G. Cross-ocean distribution of Rhodobacterales bacteria as primary surface  
215 colonizers in temperate coastal marine waters. *Appl. Environ. Microbiol.* **2008**, 74, 52–60.



- 216 34. Márquez, M.C.; Carrasco, I.J.; Xue, Y.; Ma, Y.; Cowan, D.A.; Jones, B.E.; Grant W.D.; Ventosa A.  
217 *Aquisalimonas asiatica* gen. nov., sp. nov., a moderately halophilic bacterium isolated from an alkaline, saline  
218 lake in Inner Mongolia, China. *Int. J. Syst. Evol. Microbiol.* **2007**, *57*, 1137–1142.
- 219 35. Zhang, Y.J.; Jia, M.; Ma, Y.C.; Lu, K.Y.; Tian, F.; Klenk, H.P.; Zhou Y.; Tang S.K. *Aquisalimonas halophila* sp.  
220 nov., a moderately halophilic bacterium isolated from a hypersaline mine. *Int. J. Syst. Evol. Microbiol.* **2014**, *64*,  
221 2210–2216.
- 222 36. Infante-Dominguez, C.; Sanchez-Porro, C.; Ventosa, A. *Aquisalimonas lutea* sp. nov., a moderately halophilic  
223 bacterium from a saltern. *Int. J. Syst. Evol. Microbiol.* **2015**, *65*, 1354–1359.
- 224 37. Park, J.W.; Crowley, D.E. Normalization of soil DNA extraction for accurate quantification of target genes by  
225 real-time PCR and DGGE. *Biotechniques* **2005**, *38*, 579–586.
- 226 38. Straub, K.L.; Benz, M.; Schink, B.; Widdel, E. Anaerobic, nitrate-dependent microbial oxidation of ferrous iron.  
227 *Appl. Environ. Microbiol.* **1996**, *62*, 1458–1460.
- 228 39. Blöthe, M.; Roden, E.E. Composition and activity of an autotrophic Fe(II)-oxidizing, nitrate-reducing enrichment  
229 culture. *Appl. Environ. Microbiol.* **2009**, *75*, 6937–6940.
- 230 40. Schleheck, D.; Tindall, B.J.; Rosselló-Mora, R.; Cook, A.M. *Parvibaculum lavamentivorans* gen. nov., sp. nov.,  
231 a novel heterotroph that initiates catabolism of linear alkylbenzenesulfonate. *Int. J. Syst. Evol. Microbiol.* **2004**,  
232 *54*, 1489–1497.
- 233 41. Hilyard, E.J.; Jones-Meehan, J.M.; Spargo, B. J.; Hill, R. T. Enrichment, isolation, and phylogenetic identification  
234 of polycyclic aromatic hydrocarbon-degrading bacteria from Elizabeth River sediments. *Appl. Environ.*  
235 *Microbiol.* **2008**, *74*, 1176–1182.
- 236 42. Wang, W.; Wang, L.; Shao, Z. Diversity and abundance of oil-degrading bacteria and alkane hydroxylase (*alkB*)  
237 genes in the subtropical seawater of Xiamen Island. *Microb. Ecol.* **2010**, *60*, 429–439.

238 **Table 1.** Close relatives of partial 16S rRNA genes obtained from major DGGE gel bands

| Band | Close relative in GenBank databases                     | GenBank Accession # | % Identity |
|------|---------------------------------------------------------|---------------------|------------|
| A    | <i>Methylocystaceae</i> bacterium PKR-39                | KJ000026            | 85         |
| B    | <i>Novosphingobium panipatense</i> , isolate 1111TES1A3 | LN774374            | 90         |
| C    | <i>Rhodobacterales</i> bacterium PSMR052                | KJ995712            | 96         |
| D    | <i>Aquisalimonas halophila</i> YIM 95345                | KC577145            | 91         |
| E    | <i>Parvibaculum</i> sp. MBNA2                           | FN430653            | 97         |

239

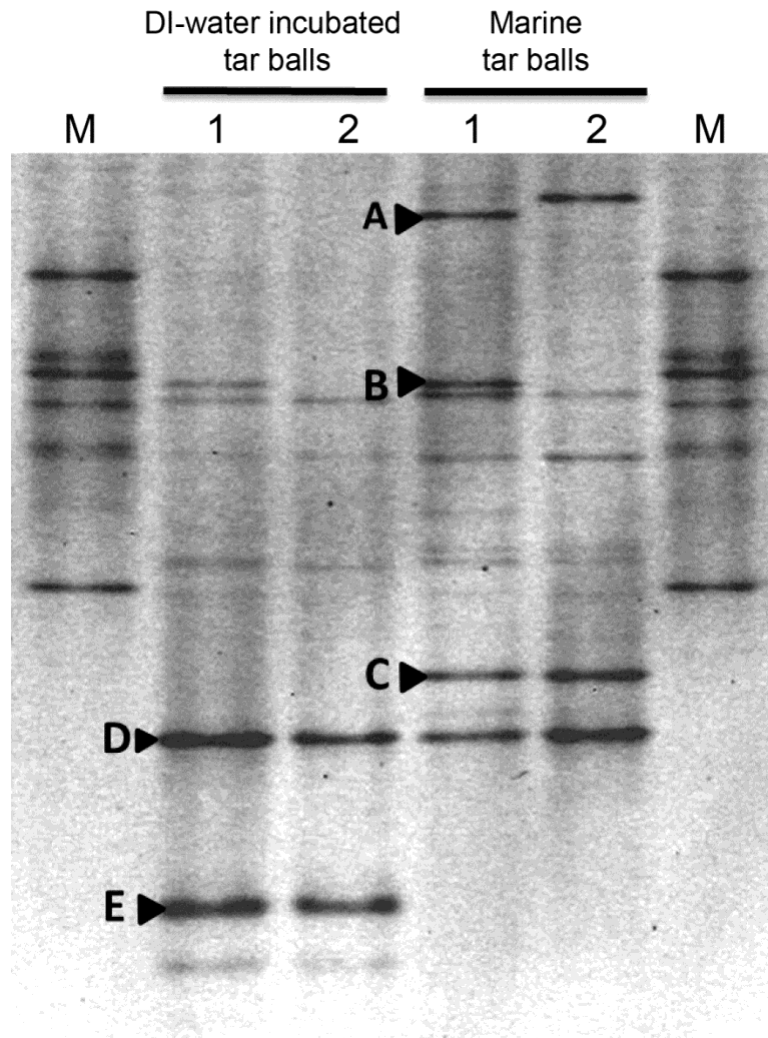

240

241

242 **Figure 1.** Bacterial community shift after exposure to low salinity conditions. Bacterial 16S rRNA gene profiles in  
243 untreated marine tar balls (Marine tar balls) and tar balls after six-month of incubation in deionized water (DI-water  
244 incubated tar balls) were analyzed by DGGE. Bands A to E were selected for sequencing. M: custom marker; numbers  
245 1 and 2 are duplicates.
